# Supplementary material for: Impact of Diabetes and Glycemia on Cardiac Improvement and Adverse Events Following Mechanical Circulatory Support
Source: PubMed Central journal article supplement — J Am Heart Assoc. 2024 Jul 11;13(14):e032936. doi: 10.1161/JAHA.123.032936 (PMC11292740; doi:10.1161/jaha.123.032936), 2024-07-11

# **SUPPLEMENTAL MATERIAL**

**Table S1. Heart failure and anti-diabetic pharmacotherapy during LVAD support in the total cohort, patients without, and with type 2 diabetes mellitus. ACE: Angiotensin converting enzyme; ARB: Angiotensin receptor blocker; ARNI: Angiotensin receptor-Neprilysin inhibitor; DPP-4: Dipeptidyl peptidase-4; GLP-1; Glucagon-like peptide-1; SGLT-2: Sodium-glucose cotransporter-2; T2DM: Type 2 diabetes mellitus; VAD: Ventricular assist device**

| <b>Variables</b>                                              | <b>Total Cohort<br/>(N=375)</b> | <b>Patients<br/>without<br/>T2DM<br/>(n=199)</b> | <b>Patients<br/>with T2DM<br/>(n=176)</b> | <b>p-value</b> |
|---------------------------------------------------------------|---------------------------------|--------------------------------------------------|-------------------------------------------|----------------|
| <u>3-months Post-VAD Heart Failure Medications</u>            |                                 |                                                  |                                           |                |
| Beta blocker, n (%)                                           | 199 (56.1%)                     | 104 (56.2%)                                      | 95 (55.9%)                                | 0.95           |
| ARNI/ARB/ACE inhibitor, n (%)                                 | 164 (43.7%)                     | 92 (46.2%)                                       | 72 (40.9%)                                | 0.30           |
| Aldosterone antagonist, n (%)                                 | 164 (46.2%)                     | 97 (52.4%)                                       | 67 (39.4%)                                | 0.014          |
| Diuretic, n (%)                                               | 271 (76.3%)                     | 132 (71.4%)                                      | 139 (81.8%)                               | 0.021          |
| <u>3-months Post-VAD Type 2 Diabetes Mellitus Medications</u> |                                 |                                                  |                                           |                |
| Insulin, n (%)                                                | -                               | -                                                | 72 (42.6%)                                | -              |
| Metformin, n (%)                                              | -                               | -                                                | 33 (28.2%)                                | -              |
| DPP-4 inhibitors, n (%)                                       | -                               | -                                                | 14 (12.0%)                                | -              |
| GLP-1 agonists, n (%)                                         | -                               | -                                                | 10 (5.7%)                                 | -              |
| SGLT-2 inhibitors, n (%)                                      | -                               | -                                                | 1 (0.6%)                                  | -              |
| Alpha-glucosidase inhibitors, n (%)                           | -                               | -                                                | 0 (0.0%)                                  | -              |

**Table S2. Univariable and multivariable analysis of the association between pre-LVAD implantation HbA1c and 3-year all-cause mortality. CI: Confidence interval; HbA1c: Glycated hemoglobin; HF: Heart failure; LVEDD: Left ventricular end-diastolic diameter**

| <b>Variable</b>               | <b>Hazard ratio [95% CI]</b> | <b>p-value</b> |
|-------------------------------|------------------------------|----------------|
| <i>Univariable analysis</i>   |                              |                |
| HbA1c                         | 1.12 [0.95 - 1.31]           | 0.177          |
| <i>Multivariable analysis</i> |                              |                |
| Age                           | 1.02 [1.00 - 1.04]           | 0.029          |
| Male sex                      | 0.81 [0.44 - 1.50]           | 0.504          |
| Duration of HF symptoms       | 1.00 [0.99 - 1.00]           | 0.905          |
| LVEDD                         | 0.74 [0.57 - 0.96]           | 0.022          |
| HbA1c                         | 1.13 [0.96 - 1.34]           | 0.152          |

**Figure S1. Kaplan-Meier survival curve for the study cohort over 3 years of follow-up.**

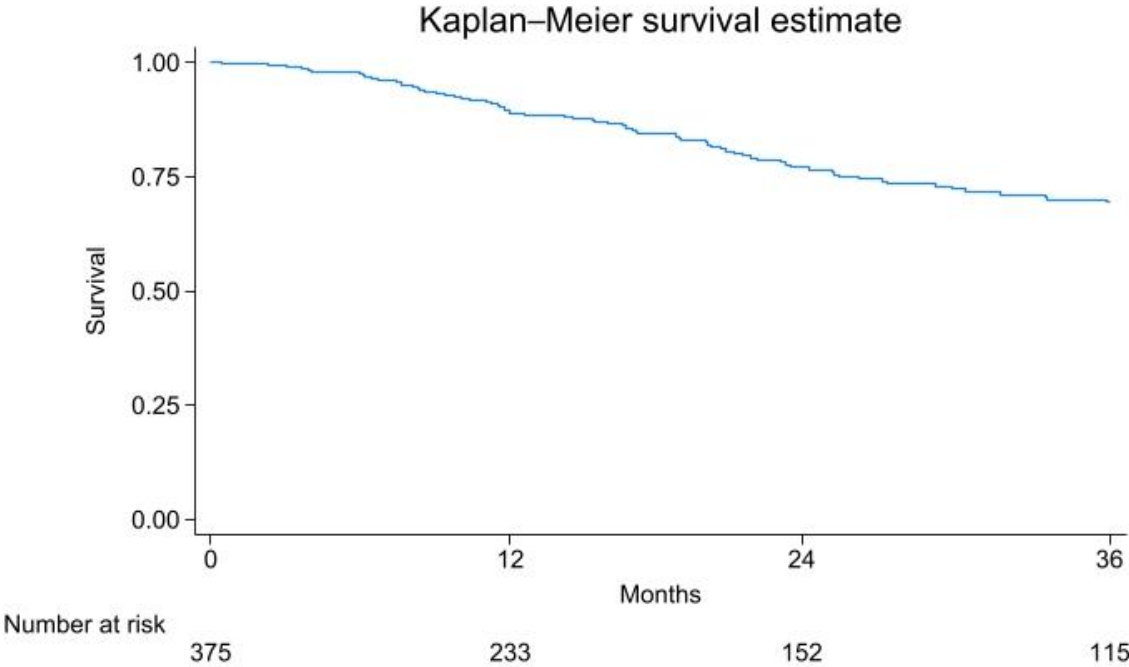

**Figure S2. Association of pre-LVAD implantation HbA1c with LVAD-related adverse events.** The x-axis represents the adjusted hazard ratios and their corresponding 95% confidence intervals. *GI: Gastrointestinal; HbA1c: Glycated hemoglobin; TIA: Transient ischemic attack; VAD: Ventricular assist device*

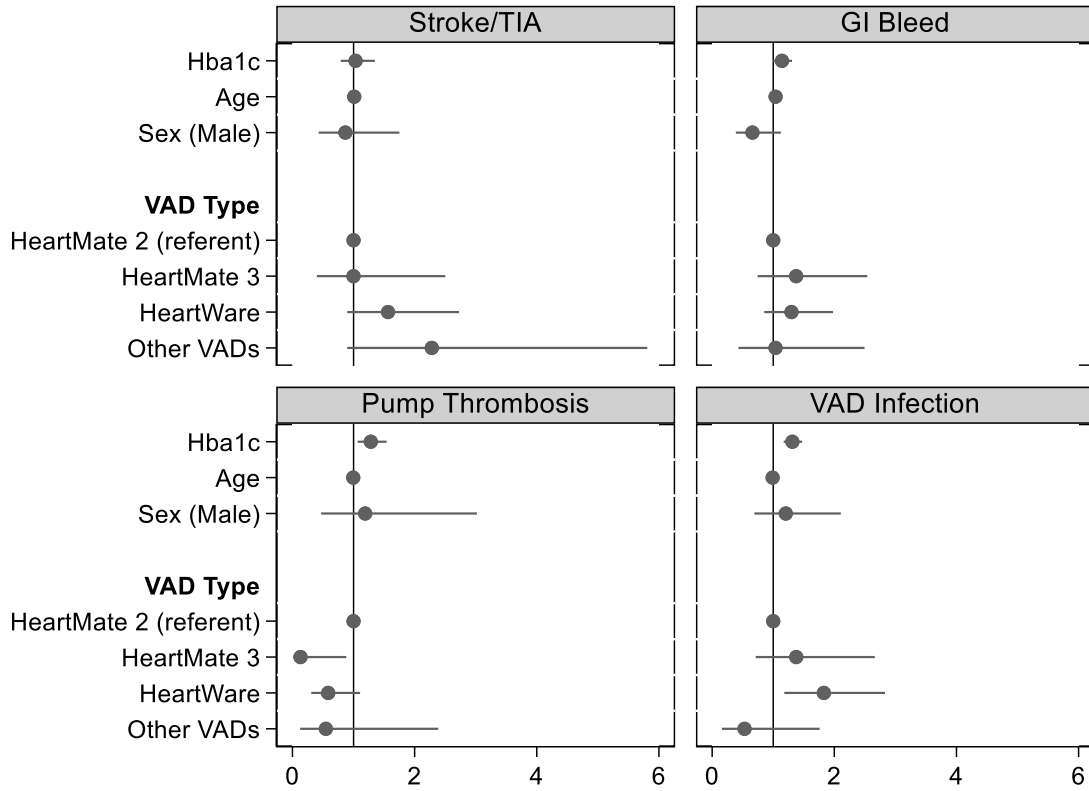

Supplement: JAH3-13-e032936-s001.pdf [file JAH3-13-e032936-s001.pdf]
